# Supplementary material
Source: MDPI journal article supplement (https://www.mdpi.com/2304-6740/8/8/45)
Supplement: s1 [file s1]

# Supplementary Materials: Second Order Nonlinear Optical Properties of 4-Styrylpyridines Axially Coordinated to A<sub>4</sub> Zn<sup>II</sup> Porphyrins: A Comparative Experimental and Theoretical Investigation

Francesca Tessore <sup>1</sup>, Gabriele Di Carlo <sup>1,\*</sup>, Alessandra Forni <sup>2</sup>, Stefania Righetto <sup>1</sup>,  
Francesca Limosani <sup>3,4</sup> and Alessio Orbelli Biroli <sup>2,5</sup>

<sup>1</sup> Department of Chemistry, University of Milan, INSTM Research Unit, Via C. Golgi 19, 20133 Milan, Italy; francesca.tessore@unimi.it (F.T.); stefania.righetto@unimi.it (S.R.)

<sup>2</sup> CNR-SCITEC, Istituto di Scienze e Tecnologie Chimiche “G. Natta”, c/o University of Milan, Via C. Golgi 19, 20133 Milan, Italy; alessandra.forni@scitec.cnr.it (A.F.); alessio.orbellibiroli@unipv.it (A.O.B.)

<sup>3</sup> Fusion and Nuclear Security Department, Photonics Micro and Nanostructures Laboratory, ENEA, Via E. Fermi 45, 00044 Frascati, Rome, Italy; francescalim@hotmail.it

<sup>4</sup> Department of Chemical Science and Technologies, University of Rome Tor Vergata, Via della Ricerca Scientifica 1, 00133 Rome, Italy

<sup>5</sup> Department of Chemistry, University of Pavia, Via Taramelli 12, 27100 Pavia, Italy

\* Correspondence: gabriele.dicarlo@unimi.it

## Materials and Methods

All reagents and solvents were purchased from Sigma-Aldrich and used as received. Milli-Q water was collected from Millipore apparatus, equipped with 0.22 µm filters. Glassware was flame-dried under vacuum before use when necessary. Silica gel for gravimetric chromatography (Geduran Si 60, 63–200 µm) and for flash chromatography (Kieselgel 60, 0.040–0.063 mm) were purchased from Merck. <sup>1</sup>H-NMR spectra were recorded on a Bruker AMX 300 and on a Bruker Avance DRX-400 in CDCl<sub>3</sub> or in THF-*d*<sub>8</sub>, to enhance resolution (Cambridge Isotope Laboratories, Inc.). Elemental analyses were carried out with a Perkin-Elmer CHN 2400 instrument in the Analytical Laboratories of the Department of Chemistry at the University of Milan. Electronic absorption spectra were recorded in CHCl<sub>3</sub> solution at room temperature on a Shimadzu UV 3600 spectrophotometer. The starting A<sub>4</sub> Zn<sup>II</sup> porphyrin complexes were prepared as reported in literature [1].

### Synthesis of L1

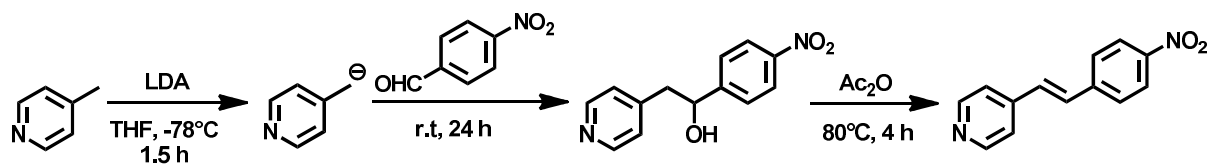

Scheme S1. Synthetic route for ligand L1.

In a dried schlenk tube 4-methylpyridine (0.559 g; 6.0 mmol) was dissolved in anhydrous THF (6 mL) under nitrogen atmosphere. After cooling at -78 °C, 4 ml of lithium diisopropylamide (LDA) solution in THF (2M) was added dropwise to the reaction mixture which was allowed to react for further 1.5 hours. 15 ml of a 4-Nitrobenzaldehyde (0.906g; 6.0 mmol) solution in THF was then slowly added, then the mixture warmed at room temperature and stirred 24 hours. 30 ml of NH<sub>4</sub>Cl-saturated aqueous solution was added to quench the reaction resulting in a two-phase mixture. The aqueous phase was extract with diethyl ether and the collected organic phase washed with deionized water and dried over Na<sub>2</sub>SO<sub>4</sub>. A yellow-orange thick residue was obtained after removing the solvents and used without further purification for the next dehydration step.

The crude was dissolved in freshly distilled acetic anhydride (20 mL) and refluxed for 4h under vigorous stirring. The solvent was then removed, the brown oil residue dissolved in

dichloromethane and washed first with 10% NaOH aqueous solution and then with deionized water. After drying the organic phase over  $\text{MgSO}_4$  and evaporated to dryness the crude was purified by column chromatography over silica gel (ethyl acetate/hexane 8:2 as eluent) to give the pure **L1** as a pale-yellow powder (0.543 g, 40%).

$^1\text{H}$  NMR (400 MHz,  $\text{CDCl}_3$ )  $\delta$  (ppm): 7.15 (d, 1H,  $J_{\text{trans}} = 16$  Hz), 7.32 (d, 1H,  $J_{\text{trans}} = 16$  Hz), 7.37 (d, 2H), 7.64 (d, 2H), 8.19 (d, 2H), 8.59 (d, 2H).

Elemental analysis: calcd (%) C 69.02, H 4.46, N 12.38; found C 69.21, H 4.45, N 12.41.

General procedure for the axial coordination of **L1** and **L2** to  $\text{A}_4$   $\text{Zn}^{\text{II}}$  porphyrins

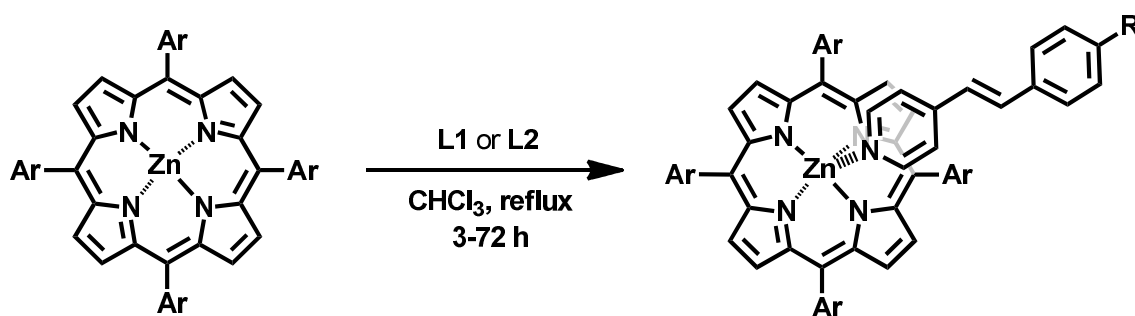

**Scheme S2.** Schematic axial coordination of **L1** or **L2** to  $\text{Zn}^{\text{II}}$  porphyrins.

In a two-neck round bottom flask equipped with a condenser and a dropping-funnel the selected  $\text{Zn}^{\text{II}}$ -porphyrin (1.0 equiv.) was dissolved in chloroform, and the resulting  $1.0 \times 10^{-3}$  M solution was warmed to reflux. After that the appropriate stilbazole-based ligand (1.5 equiv. for **L1** and 1.0 equiv. for **L2**) dissolved in the minimum amount of chloroform was added dropwise to the refluxing solution in 10 minutes. Depending on the specific combination of porphyrin and ligand the axial coordination step required from 3 hours to 72 hours to proceed quantitatively. All desired complexes were purely obtained in almost quantitative yield ( $\geq 98\%$ ) by evaporating the solvent, thoroughly washing the solid with *n*-hexane and recrystallizing from  $\text{CHCl}_3/n$ -hexane.

**ZnTPP-L1** [3 hours]:  $^1\text{H}$ -NMR (400 MHz,  $\text{CDCl}_3$ )  $\delta$  (ppm): 3.74 (br. s, 2H), 5.98 (br. s, 2H), 6.32 (d, 1H), 6.58 (d, 1H), 7.24 (d, 2H), 7.76 (s, 12H), 8.00 (d, 2H), 8.23 (s, 8H), 8.90 (s, 8H).

Elemental analysis: calcd (%) C 75.70, H 4.24, N 9.29; found C 75.91, H 4.23, N 9.27.

**ZnTPP-L2** [3 hours]:  $^1\text{H}$ -NMR (400 MHz,  $\text{CDCl}_3$ )  $\delta$  (ppm): 2.91 (s, 6H), 6.18 (br. d., 1H), 6.31 (br. d, 2H), 6.52 (d, 2H), 6.80 (br. d., 1H), 7.15 (d, 2H), 7.75 (m, 12H), 8.24 (s, 8H), 8.91 (s, 8H).

$^1\text{H}$ -NMR (400 MHz,  $\text{THF-d}_8$ )  $\delta$  (ppm): 3.00 (s, 6H), 6.73 (d, 2H), 6.82 (d, 1H), 7.27 (d, 2H), 7.32 (d, 1H), 7.43 (d, 2H), 7.78 (m, 12H), 7.89 (d, 2H), 8.21 (dd, 8H), 8.86 (s, 8H).

Elemental analysis: calcd (%) C 78.53, H 4.91, N 9.31; found C 78.77, H 4.90, N 9.33.

**ZnTBP-L1** [24 hours]:  $^1\text{H}$ -NMR (400 MHz,  $\text{CDCl}_3$ )  $\delta$  (ppm) 4.39 (br. s, 2H), 6.20 (br. s, 2H), 6.48 (d, 1H), 6.71 (d, 1H), 7.35 (d, 2H), 7.82 (s, 4H), 8.08 (d, 2H), 8.12 (s, 8H), 8.99 (s, 8H).

Elemental analysis: calcd (%) C 79.00, H 7.60, N 6.21; found C 79.24, H 7.58, N 6.19.

**ZnTBP-L2** [3 hours]:  $^1\text{H}$ -NMR (400 MHz,  $\text{CDCl}_3$ )  $\delta$  (ppm) 2.94 (s, 6H), 6.21 (d, 1H), 6.32 (br. s, 2H), 6.56 (d, 2H), 6.78 (d, 1H), 7.18 (d, 2H), 7.78 (s, 4H), 8.10 (s, 8H), 8.96 (s, 8H).

Elemental analysis: calcd (%) C 80.89, H 8.06, N 6.22; found C 80.98, H 8.08, N 6.21.

**ZnTNP-L1** [72 hours]:  $^1\text{H}$ -NMR (400 MHz,  $\text{THF-d}_8$ )  $\delta$  (ppm) 1.33 (m, 72 H), 2.51 (br. s, 2H), 7.46 (m, 41H), 7.55 (d, 1H), 7.83 (d, 2H), 8.03 (d, 8H), 8.23 (d, 2H), 8.44 (br. d, 2H), 9.04 (s, 8H).

Elemental analysis: calcd (%) C 81.38, H 6.88, N 6.93; found C 81.60, H 6.90, N 6.90.

**ZnTNP-L2** [4 hours]:  $^1\text{H}$ -NMR (400 MHz,  $\text{THF-d}_8$ )  $\delta$  (ppm) 1.36 (m, 72H), 2.49 (br. s, 2H), 3.01 (s, 6H), 6.73 (d, 2H), 6.89 (d, 1H), 7.49 (m, 43H), 8.09 (d, 8H), 8.42 (m, 4H), 9.04 (s, 8H).

Elemental analysis: calcd (%) C 82.64, H 7.19, N 6.93; found C 82.41, H 7.17, N 6.95.

**ZnTFP-L1** [4 hours]:  $^1\text{H}$ -NMR (400 MHz,  $\text{CDCl}_3$ )  $\delta$  (ppm) 2.44 (br. s, 2H), 5.62 (br. s, 2H), 6.14 (d, 1H), 6.41 (d, 1H), 7.18 (br. s, 2H), 8.00 (d, 2H), 8.95 (s, 8H).

Elemental analysis: calcd (%) C 54.16, H 1.44, N 6.65; found C 54.03, H 1.45, N 6.63.

**ZnTFP-L2** [3 hours]:  $^1\text{H}$ -NMR (400 MHz,  $\text{CDCl}_3$ )  $\delta$  (ppm) 2.99 (s, 6H), 6.39 (d, 1H), 6.61 (d, 2H), 6.71 (br. s, 2H), 7.00 (d, 1H), 7.26 (d, 2H), 8.93 (s, 8H).

$^1\text{H}$ -NMR (400 MHz,  $\text{THF-}d_6$ )  $\delta$  (ppm): 3.01 (s, 6H), 6.74 (d, 2H), 6.85 (d, 1H), 7.36 (m, 3H), 7.45 (d, 2H), 8.02 (br. s, 2H), 9.11 (s, 8H).

Elemental analysis: calcd (%) C 56.14, H 1.92, N 6.66; found C 56.29, H 1.91, N 6.68.

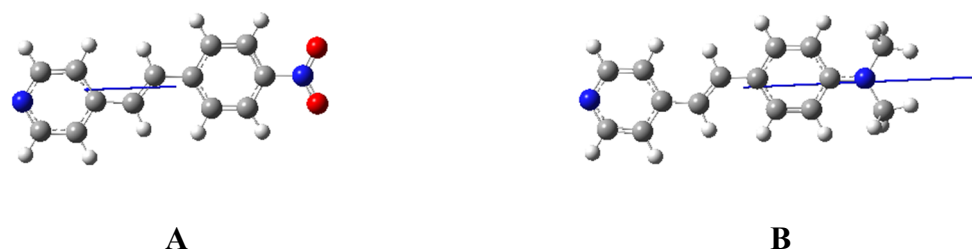

**Figure 1.** Optimized geometry of 4-styrylpyridine **L1** (A) and **L2** (B).

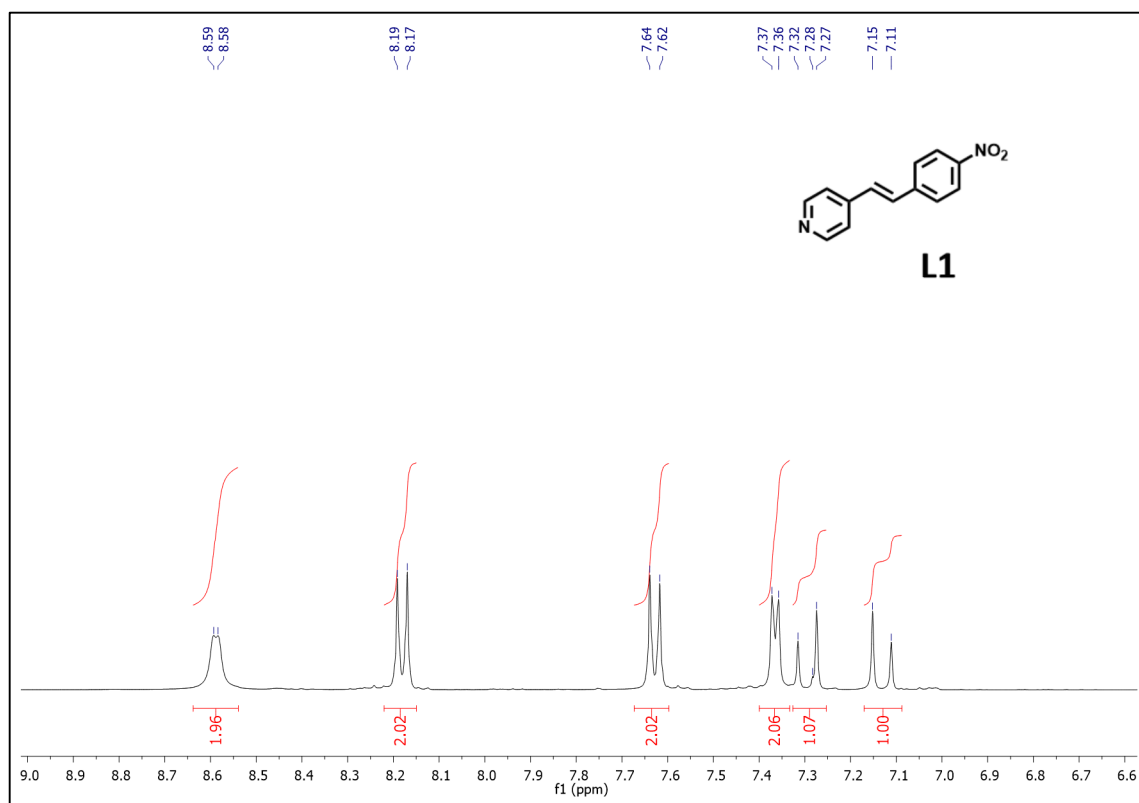

**Figure 2.**  $^1\text{H}$ -NMR spectrum of **L1** in  $\text{CDCl}_3$ .

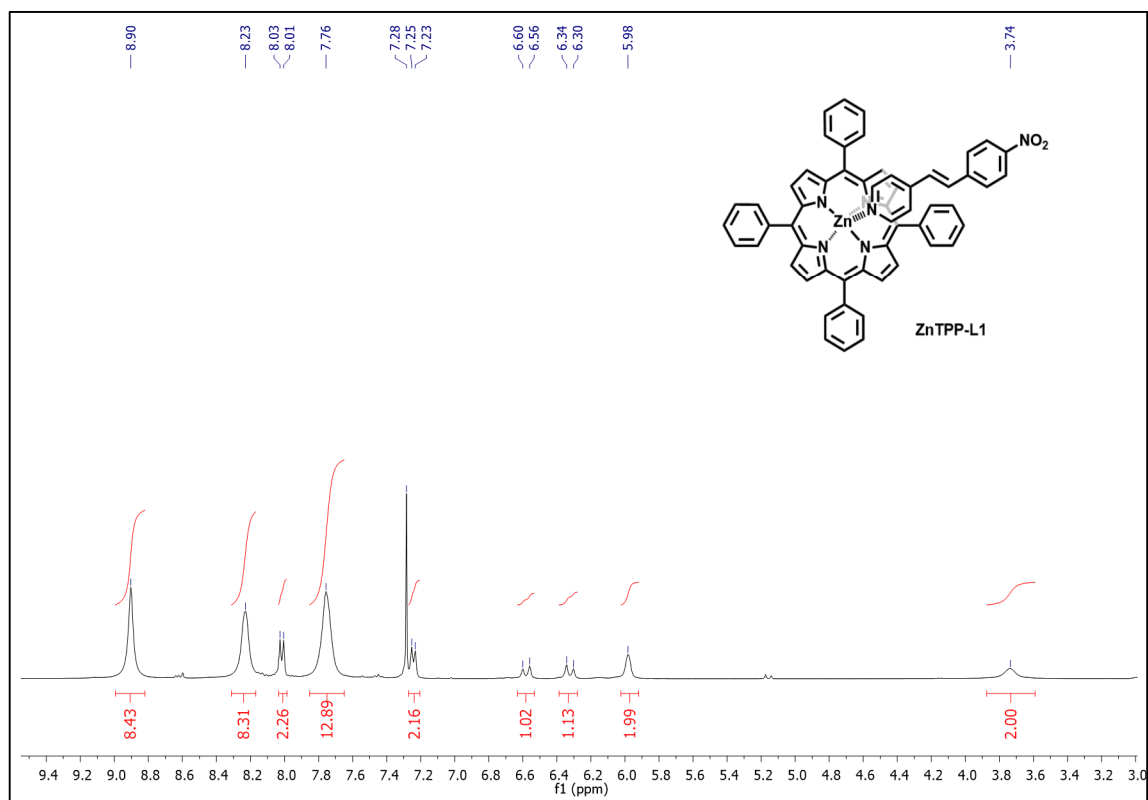

Figure 3. <sup>1</sup>H-NMR spectrum of ZnTPP-L1 in CDCl<sub>3</sub>.

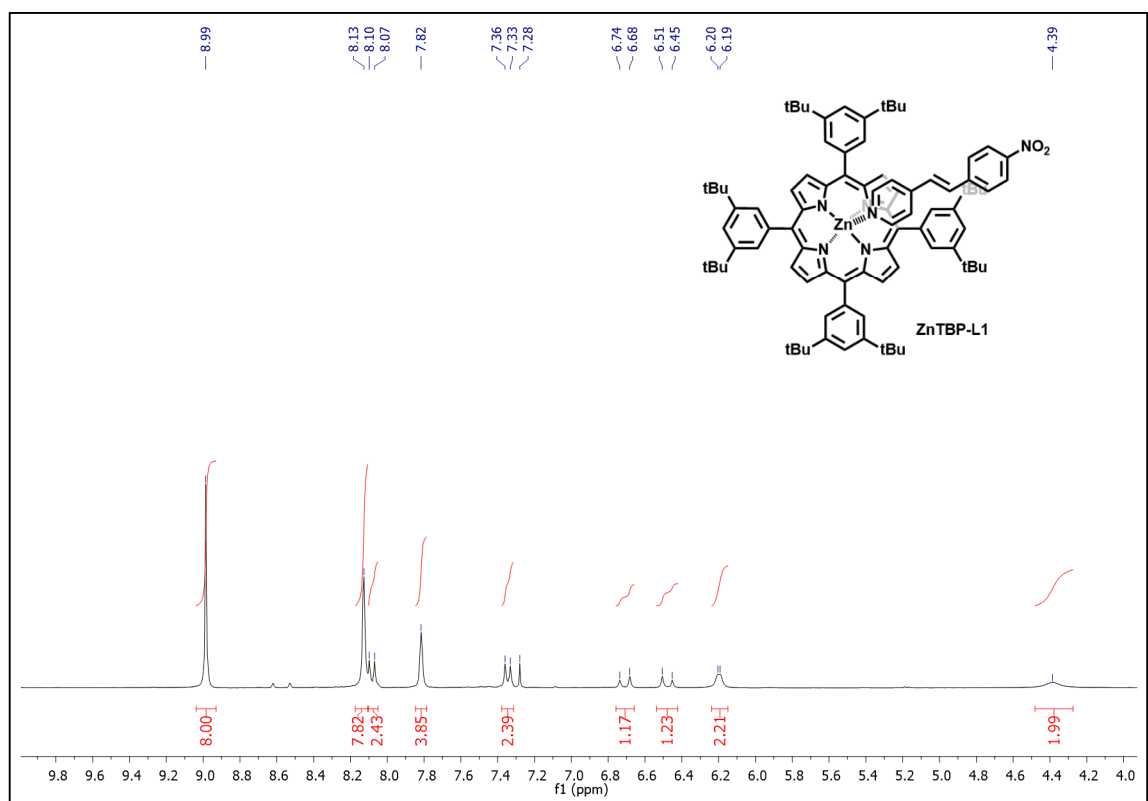

Figure 4. <sup>1</sup>H-NMR spectrum of ZnTBP-L1 in CDCl<sub>3</sub>.

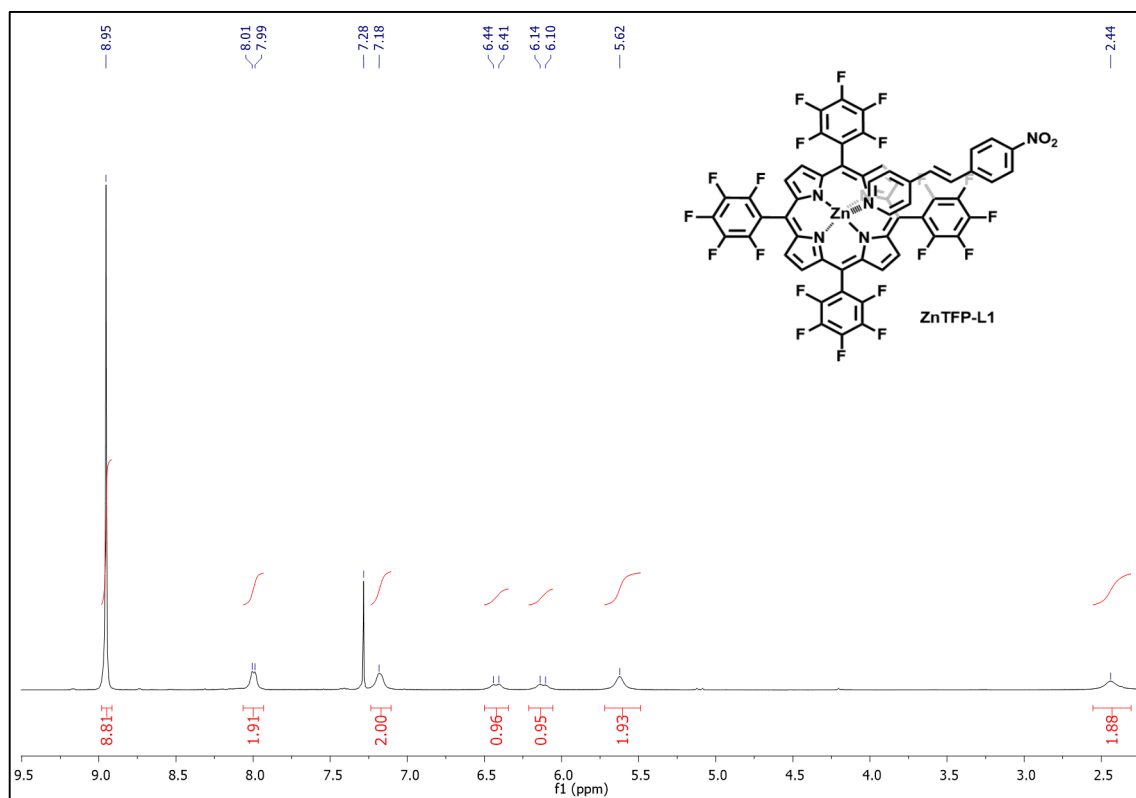

**Figure 5.**  $^1\text{H}$ -NMR spectrum of ZnTFP-L1 in  $\text{CDCl}_3$ .

Normalized UV-Vis spectra in  $\text{CHCl}_3$  solution

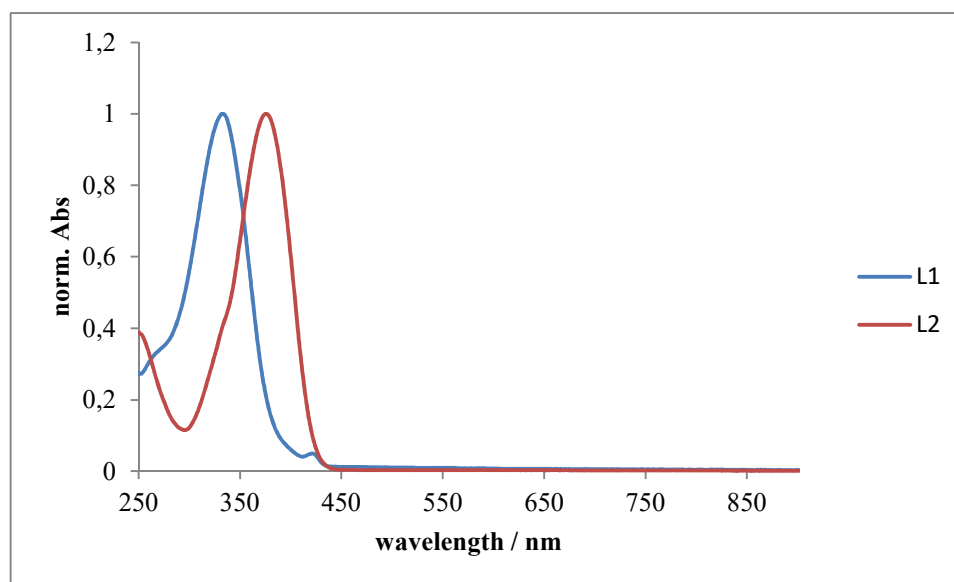

**Figure 6.** Normalized UV-Vis spectra of ligands L1 and L2.

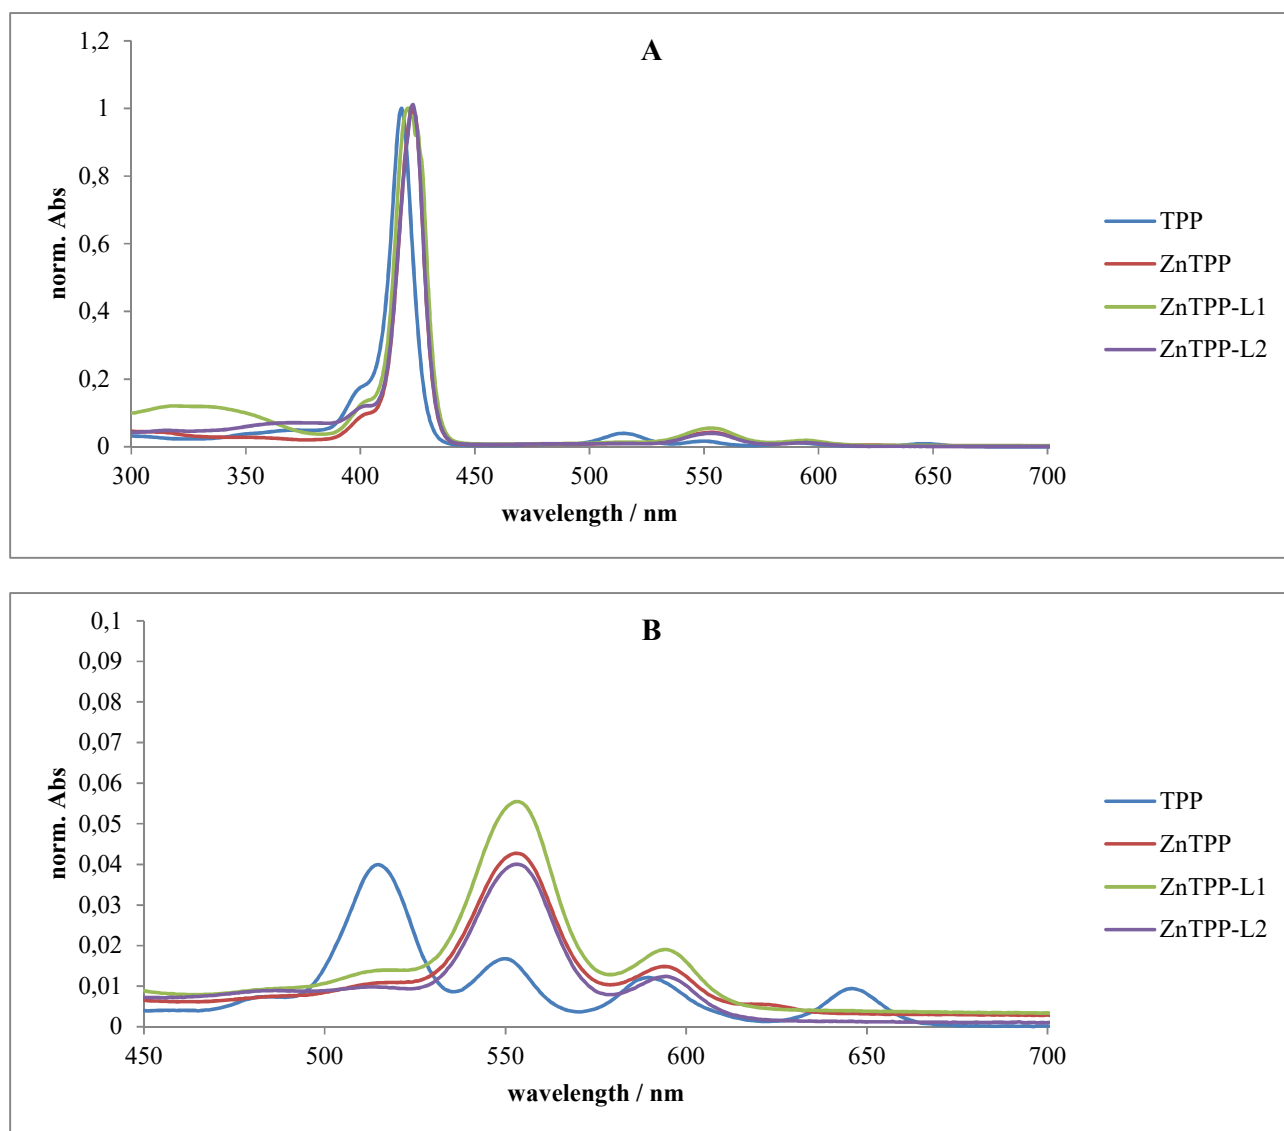

**Figure 7.** A) Normalized UV-Vis spectrum of the TPP series. B) Expansion of the Q bands.

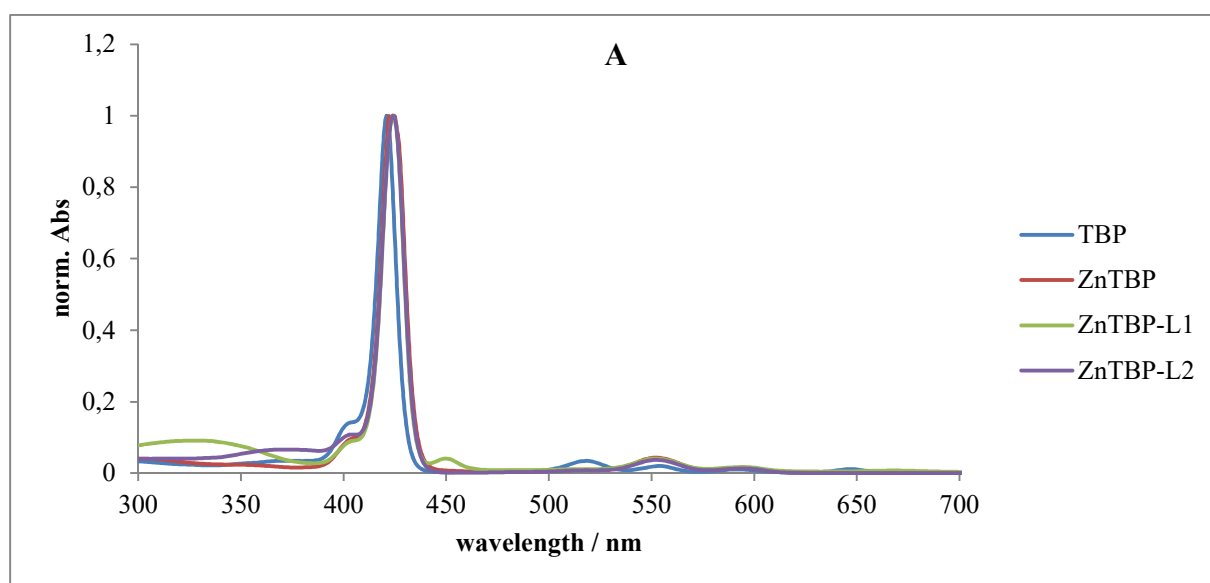

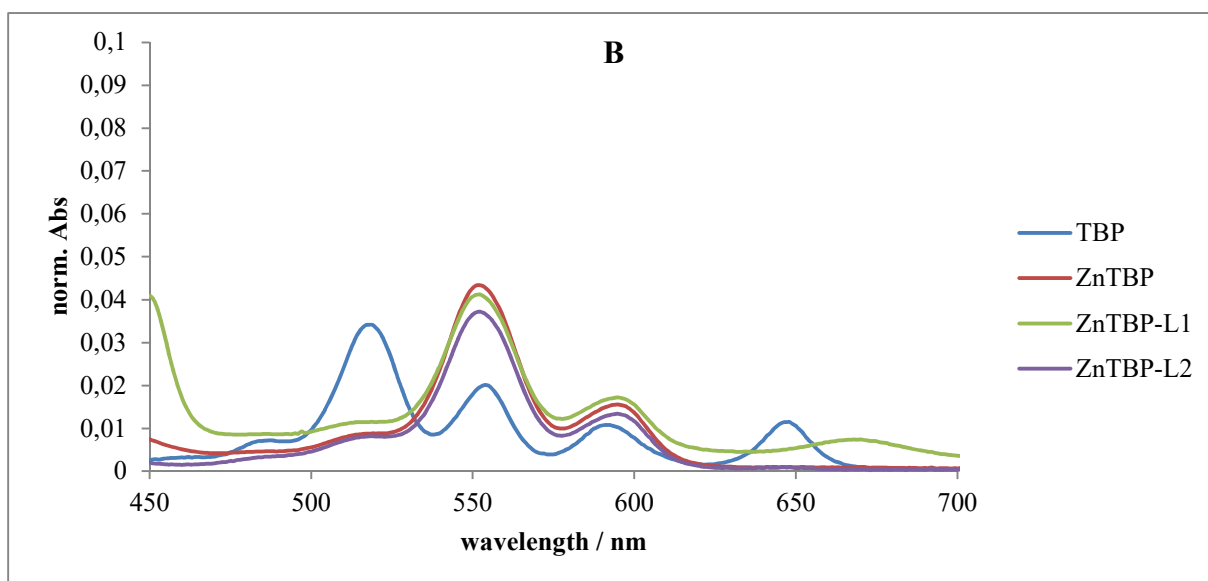

Figure 8. A) Normalized UV-Vis spectrum of the TBP series. B) Expansion of the Q bands.

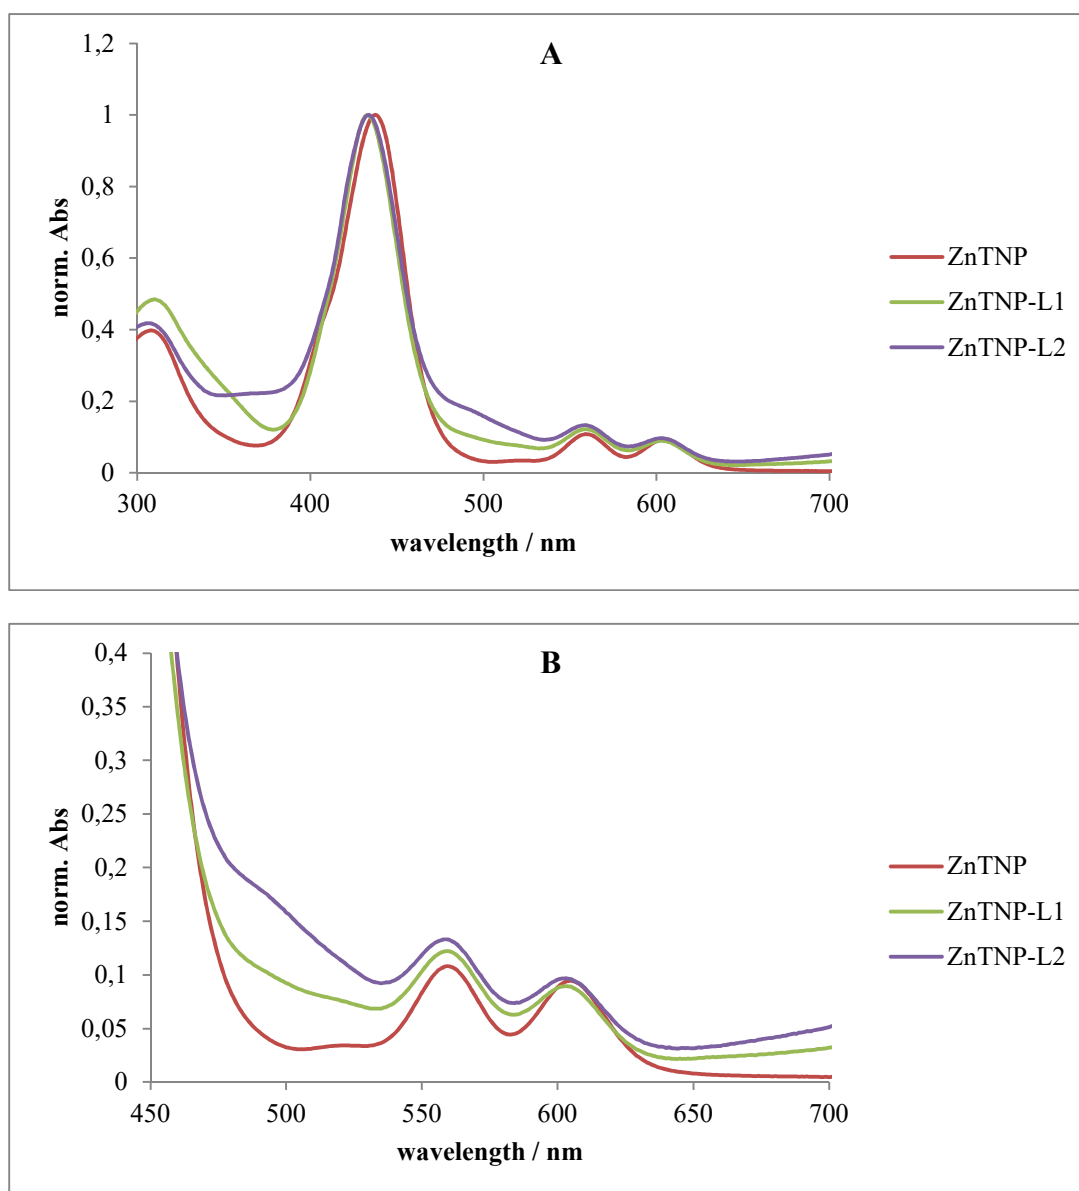

Figure 9. A) Normalized UV-Vis spectrum of the TNP series. B) Expansion of the Q bands.

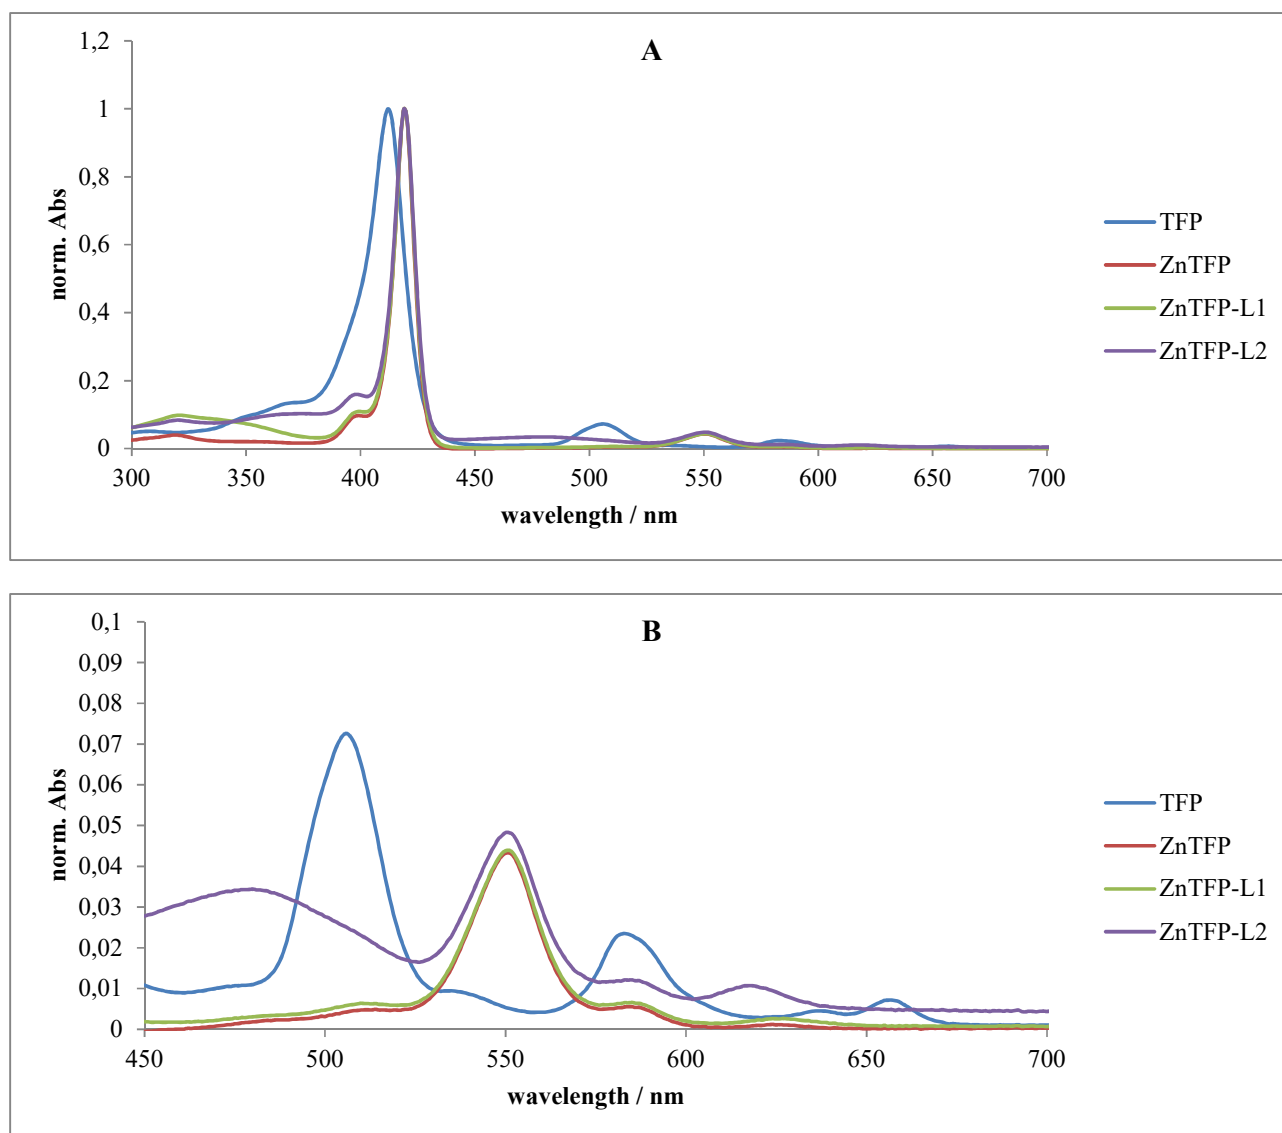

**Figure 10.** A) Normalized UV-Vis spectrum of the TFP series. B) Expansion of the Q bands.

**Table 1.** Distances between Zn and the pyridine nitrogen atom,  $R_{\text{Zn-N}}$ , in the axially coordinated  $A_4$   $\text{Zn}^{\text{II}}$  porphyrins described at the M06/6-311G(d) level of theory.

| Compound | $R_{\text{Zn-N}}$ (Å) |
|----------|-----------------------|
| ZnTFP-L1 | 2.167                 |
| ZnTPP-L1 | 2.187                 |
| ZnTBP-L1 | 2.189                 |
| ZnTNP-L1 | 2.187                 |
| ZnTFP-L2 | 2.140                 |
| ZnTPP-L2 | 2.164                 |
| ZnTBP-L2 | 2.165                 |
| ZnTNP-L2 | 2.163                 |

## References

- Di Carlo, G.; Orbelli Biroli, A.; Pizzotti, M.; Tessore, F.; Trifiletti, V.; Ruffo, R.; Abboto, A.; Amat, A.; De Angelis, F.; Mussini, P.R. Tetraaryl  $\text{Zn}^{\text{II}}$  porphyrinates substituted at  $\beta$ -pyrrolic positions as sensitizers in dye-sensitized solar cells: A comparison with meso-disubstituted push-pull  $\text{Zn}^{\text{II}}$  porphyrinates. *Chem. - Eur. J.* **2013**, *19*, 10723–10740, doi:10.1002/chem.201300219.
